# Supplementary material
Source: PubMed Central journal article supplement (PMC4768351)
Supplement: NIHMS67218-supplement-Supplementary_Material.pdf [file NIHMS67218-supplement-Supplementary_Material.pdf]

Supplementary Materials for  
**Protein kinase D2 is a digital amplifier of T cell receptor–stimulated  
diacylglycerol signaling in naïve CD8<sup>+</sup> T cells**

María N. Navarro, Carmen Feijoo-Carnero, Alba Gonzalez Arandilla, Matthias Trost,  
Doreen A. Cantrell\*

\*Corresponding author. E-mail: d.a.cantrell@dundee.ac.uk

Published 21 October 2014, *Sci. Signal.* **7**, ra99 (2014)  
DOI: 10.1126/scisignal.2005477

**The PDF file includes:**

Fig. S1. Quantification of the number of pMHC molecules per RMA-S cell.

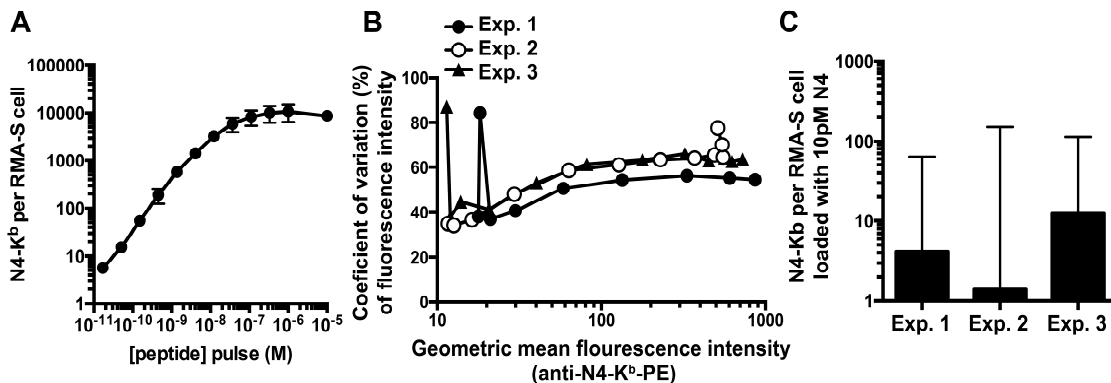

**Fig. S1. Quantification of the number of pMHC molecules per RMA-S cell.** RMA-S cells were loaded with different amounts of N4 peptide, stained with PE-coupled anti-N4-K<sup>b</sup> antibody, and analyzed by flow cytometry. The number of pMHC molecules was determined by measuring the MFI of the PE-coupled anti-N4-K<sup>b</sup> antibody with PE-Quantibrite beads. **(A)** The numbers of pMHC molecules presented per RMA cell loaded with the indicated concentrations of N4 peptide. Data are means  $\pm$  SD from three independent experiments. **(B)** The coefficients of variation of the MFI data for the different concentrations of N4 peptide used in the each of the three experiments described in (A). **(C)** The distribution (MFI  $\pm$  SD) of the number of pMHC molecules presented per RMA cell loaded with 1 pM N4 peptide, which was the lowest concentration of loading peptide for which pPKD2<sup>Ser873</sup> was detected by flow cytometry.
